# Supplementary material for: Uncontacted Waorani in the Yasuní Biosphere Reserve: Geographical Validation of the Zona Intangible Tagaeri Taromenane (ZITT)
Source: PubMed Central journal article supplement (PMC3686793; doi:10.1371/journal.pone.0066293), 2013-06-19
Supplement: pone.0066293.s008.pdf [file pone.0066293.s008.pdf]

**Table S1. Metric coordinates of the 17 given points by the Presidential Decree 2187 (2007) defining the Intangible Zone Tagaeri Taromenane.**

| No. | UTM 18s - PSAD<br>1956 <sup>a</sup> |         | Distance to the following point<br>(m) |
|-----|-------------------------------------|---------|----------------------------------------|
|     | X (m)                               | Y (m)   |                                        |
| 1   | 308703                              | 9880258 | 9919                                   |
| 2   | 318314                              | 9882711 | 4577                                   |
| 3   | 317709                              | 9887248 | 5984                                   |
| 4   | 322749                              | 9890474 | 13550                                  |
| 5   | 336056                              | 9893028 | 3460                                   |
| 6   | 339450                              | 9892355 | 23279                                  |
| 7   | 359579                              | 9880661 | 50111                                  |
| 8   | 409111                              | 9873067 | 20593                                  |
| 9   | 428433                              | 9880191 | 17746                                  |
| 10  | 446142                              | 9881333 | 6914                                   |
| 11  | 453054                              | 9881510 | 54154                                  |
| 12  | 438379                              | 9829382 | 3176                                   |
| 13  | 435221                              | 9829046 | 5358                                   |
| 14  | 431894                              | 9824846 | 129577                                 |
| 15  | 303309                              | 9840849 | 10238                                  |
| 16  | 303347                              | 9851087 | 10442                                  |
| 17  | 308569                              | 9860130 | 20128                                  |
