# Supplementary material for: Uncontacted Waorani in the Yasuní Biosphere Reserve: Geographical Validation of the Zona Intangible Tagaeri Taromenane (ZITT)
Source: PubMed Central journal article supplement (PMC3686793; doi:10.1371/journal.pone.0066293), 2013-06-19
Supplement: pone.0066293.s009.pdf [file pone.0066293.s009.pdf]

**Table S2. Geospatial raster data used in GIS analyses: coverage, typology, resolution and sources.**

| <b>Coverage</b>    | <b>Typology</b>                                                                    | <b>Geometric resolution</b> | <b>Source</b> | <b>Year</b>                                                                                                |
|--------------------|------------------------------------------------------------------------------------|-----------------------------|---------------|------------------------------------------------------------------------------------------------------------|
| Orellana, Pastaza  | Digital Elevation Model (DEM)                                                      | 30 meters                   | IGM Ecuador   | 2011                                                                                                       |
| Orellana, Pastaza  | Digital Elevation Model (DEM)                                                      | 92 meters                   | SRTM          | 2000 (February)                                                                                            |
| Orellana, Pastaza  | Digital Elevation Model (DEM)                                                      | 30 meters                   | GDEM2         | 2009                                                                                                       |
| 3 satellite scenes | Landsat 5 Thematic Mapper false colour composition<br>4 (blue), 5 (green), 7 (red) | 30 meters                   | Landsat USGS  | - 19 <sup>th</sup> of February 1991<br>- 28 <sup>th</sup> of August 2005<br>- 2 <sup>nd</sup> of July 2005 |
