# Supplementary material for: Uncontacted Waorani in the Yasuní Biosphere Reserve: Geographical Validation of the Zona Intangible Tagaeri Taromenane (ZITT)
Source: PubMed Central journal article supplement (PMC3686793; doi:10.1371/journal.pone.0066293), 2013-06-19
Supplement: pone.0066293.s010.pdf [file pone.0066293.s010.pdf]

**Table S3. Characteristics and sources vector geodata.**

| <b>Geographical layers</b>                               | <b>Geometrical structure</b> | <b>format</b> | <b>Source</b>                          | <b>year</b>          |
|----------------------------------------------------------|------------------------------|---------------|----------------------------------------|----------------------|
| <b>River network</b>                                     | line                         | shape         | Geo-portal IGM Ecuador                 | 2012                 |
| <b>River basin</b>                                       | polygon                      | shape         | ECORAE                                 | 2008                 |
| <b>Urban centers</b>                                     | point                        | shape         | ECORAE                                 | 2008                 |
| <b>Road network</b>                                      | line                         | shape         | ECORAE                                 | 2008                 |
| <b>New roads</b>                                         | line                         | shape         | GPS survey, Pappalardo (Thesis, QD)    | 2009<br>2010<br>2011 |
| <b>Local communities</b>                                 | point                        | shape         | ECORAE                                 | 2008                 |
| <b>Local communities</b>                                 | point                        | shape         | GPS survey, (Pappalardo)               | 2009<br>2012         |
| <b>Tagaeri Taromenane clans distribution</b>             | polygon                      | shape         | Ministry of Justice (PMC)              | 2012                 |
| <b>Yasuní National Park</b>                              | polygon                      | shape         | World Database of Protected Areas      | 2010                 |
| <b>Waorani Indigenous Reserve</b>                        | polygon                      | shape         | World Database of Protected Areas      | 2009                 |
| <b>Intangible Zone Tagaeri Taromenane (ZITT)</b>         | polygon                      | shape         | Justice Ministry (PMC)                 | 2011                 |
| <b>Oil blocks<sup>a</sup></b>                            | polygon                      | shape         | Secretaria de Hidrocarburos de Ecuador | 2012                 |
| <b>Oil fields</b>                                        | polygon                      | shape         | ECORAE                                 | 2008                 |
| <b>Oil wells (exploratory, productive and injectors)</b> | points                       | shape         | ECORAE                                 | 2008                 |
